# Supplementary material for: Protection From Clinical Peripheral Sensory Neuropathy in Alstrom Syndrome in Contrast to Early-Onset Type 2 Diabetes
Source: Oxford University Press journal article supplement (doi:10.2337/dc08-1584), 2008-12-18
Supplement: dc08-1584_online_appendix.doc [file dc08-1584_online_appendix.doc]

**Questionnaire for symptoms suggestive of neuropathy in Alstrom and type 2 diabetic subjects**

Questions:

I want you to think about both your legs and feet.

1. Have you had any pain or discomfort, such as burning, tingling, numbness or any other unusual feelings, when you are **not** walking in the last 6 months?

|  |
| --- |

Yes

|  |
| --- |

No

|  |
| --- |

Don’t know

2. How long have you had the discomfort?

|  |
| --- |

Months and years

3. Free text to further describe how often it occurs and when.

**Clinical Protocol**

A standardised questionnaire seeking symptoms of bilateral lancinating or burning pain in both feet especially at night was administered to all subjects Figure 1. Research grade 2, 4, 6, 8, 10, 15 gm monofilaments (Bailey Instruments, Ltd., Manchester, UK) and 128 MHz tuning forks were used to test for protective sensation in subjects with eyes closed. We assessed signs of early neuropathy using six sites on each foot, as previously described (5). Calloused areas were avoided-the fibre applied to the closest area of non calloused skin. Monofilaments were subjected to quality control before the start of the study and at one year and shown to deform at a pressure within 10% of assigned value on both occasions. A tuning fork was pinched apposing the tips of the tines to induce vibration and applied to the tip of each hallux in turn for 3 seconds and then damped. Vibration perception was considered to be normal if the vibrations were perceived for 3 seconds with prompt appreciation of cessation when damped. Loss of vibration perception was only diagnosed if there was complete lack of perception of the vibration. Diagnosis of peripheral neuropathy was made when two of the following were present; absence of vibration perception, loss of 1 or more 10 gram monofilament test responses, or typical neuropathic symptoms.

Table A1. Characteristics of young onset type 2 diabetic subjects, Alström subjects with normal glucose tolerance and Alström subjects with type 2 diabetes; standard deviation in parenthesis; na not applicable as some Alström subjects without diabetes were children. Significance testing: Anova for BMI (body mass index) height and HbA1c.

| **Group** | **Number** | **Age years** | **Gender** | **Years of diabetes** | **Height metres** | **BMI Kg/M2** | **HbA1c %** |
| --- | --- | --- | --- | --- | --- | --- | --- |
| **Type 2 diabetes** | 30 | 24.1(8.5) | 8M | 4.6 (3.2) | 165(9.5) | 36.5 (8.7) | 8.6 (2.5) |
| **Alström non DM** | 18 | 19.4(9.2) | 12 M | na | na | na | 5.2(0.3) |
| **Alström DM** | 40 | 22.0(6) | 12 M | 13.8 (2.8) | 162 (9.1) | 32.1 (4.6) | 9.1(1.5) |
| **P value** |  | 0.41 | NS | 0.006 | 0.07 | 0.13 | 0.14 |
